# Supplementary material
Source: PubMed Central journal article supplement (PMC4290428)

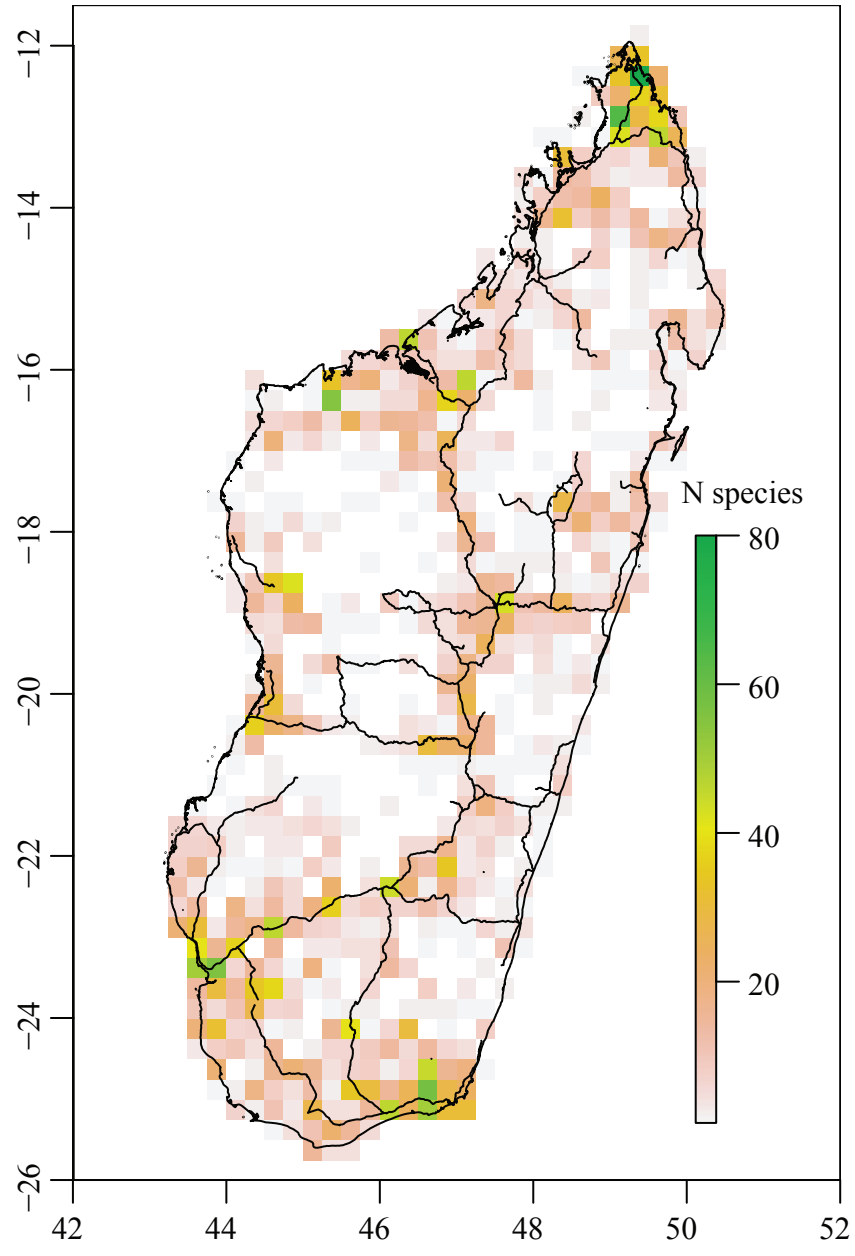

Supplement: rstb20140014supp1.pdf [file rstb20140014supp1.pdf]
